# Supplementary material for: Facile synthesis of TiO2/graphene composites for selective enrichment of phosphopeptides
Source: Royal Society of Chemistry journal article supplement (doi:10.1039/c2nr11791f), 2012-01-01
Supplement: c2nr11791f.pdf [file c2nr11791f.pdf]

## Experimental Details

### Materials and chemicals

Bovine  $\beta$ -casein, bovine serum albumin, ovalbumin, trypsin (from bovine pancreas, TPCK treated), ammonium bicarbonate ( $\text{NH}_4\text{HCO}_3$ ), Dithiothreitol (DTT), iodoacetamide (IAA) and 2, 5-dihydroxybenzoic acid (DHB) were purchased from Sigma Chemical (St. Louis, MO). Acetonitrile (ACN) and trifluoroacetic acid (TFA) were purchased from Merck (Darmstadt, Germany). All aqueous solutions were prepared using Milli-Q water by Milli-Q system (Millipore, Bedford, MA). Graphene was purchased from Shanghai Boson Technology Co. Ltd. All other chemicals and reagents were of analytical grade and were purchased from Shanghai Chemical Reagent.

### Characterization of $\text{TiO}_2$ /graphene composites

The morphologies of the as-synthesized  $\text{TiO}_2$ /graphene composites were studied under transmission electron microscopy (JEM-2100F) and scanning electron microscopy (XL30) respectively. Powder X-ray diffraction (XRD) patterns were recorded on a Bruker D4 X-ray diffractometer with Ni-filtered  $\text{Cu K}_\alpha$  radiation (40 kV, 40 mA). Nitrogen adsorption and desorption isotherms were measured using Micromeritics ASAP 2020. The samples were degassed in a vacuum at 200°C for 8 h prior to measurement. The Brunauer-Emmett-Teller (BET) method was utilized to calculate the specific surface areas ( $S_{\text{BET}}$ ) using adsorption data in a relative pressure range from 0.18 to 0.35. By using the Barrett-Joyner-Halenda (BJH) model, the pore

volumes and pore size distributions were derived from the desorption branches of the isotherms, and the total pore volumes ( $V_t$ ) were estimated from the adsorbed amount at a relative pressure  $P/P_0$  of 0.992.

### **Preparation of standard protein digests**

Bovine  $\beta$ -casein, ovalbumin and Bovine serum albumin (BSA) were dissolved in 25mM  $\text{NH}_4\text{HCO}_3$  buffer at pH 8.3 and treated with trypsin (2%, w/w) for 16 h at 37 °C respectively. Before the digestion, ovalbumin and BSA were reduced with DTT and carboxamidomethylated with iodoacetamide respectively. Bovine  $\beta$ -casein was digested directly.

### **Selectively enrichment of phosphopeptides from tryptic digestion of standard proteins**

First, the peptide mixtures originating from tryptic digestions were diluted by 50% acetonitrile and 0.1% TFA aqueous solution (v/v), and suspension of  $\text{TiO}_2$ /graphene composites (400 $\mu\text{g}$ ) was added into 200  $\mu\text{L}$  of diluted peptide mixture. Then the mixed solutions were vibrated at 25°C for 30 min. After that, through centrifugation, the pellucid solutions were taken out. After that, the  $\text{TiO}_2$ /graphene composites were washed with 50% acetonitrile and 0.1% TFA aqueous solution (v/v) for three times. Finally the peptides captured by  $\text{TiO}_2$ /graphene composites were eluted with 5  $\mu\text{L}$  of 0.4M ammonia aqueous solution for 10min and the eluate was analyzed by MALDI-TOF MS.

### MALDI-TOF MS analysis

MALDI-TOF MS experiments were performed in the reflector TOF detection modes on a 5800 Proteomics Analyzer (Applied Biosystems, USA) with the Nd-YAG laser at 383 nm, a repetition rate of 200Hz and an acceleration voltage of 20 kV. All spectra were taken from signal-averaging of 800 laser shots with the laser intensity kept at a proper constant.

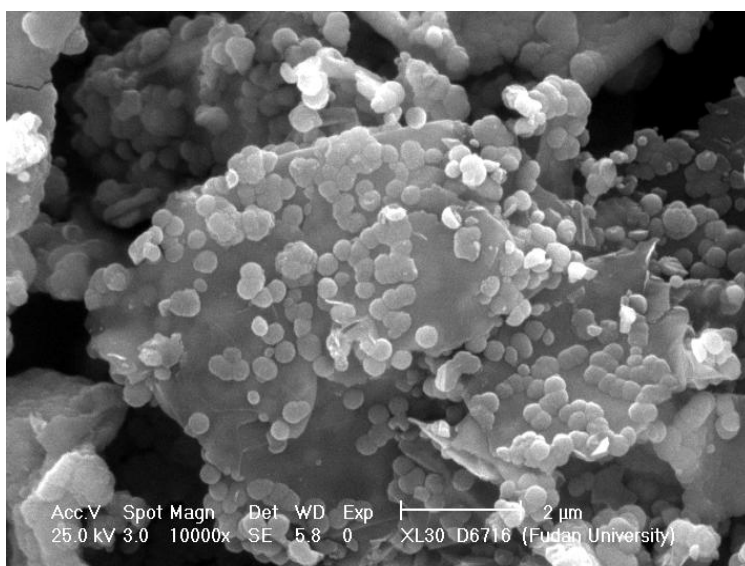

**Figure S1.** SEM image of TiO<sub>2</sub> nanospheres on graphene sheets.

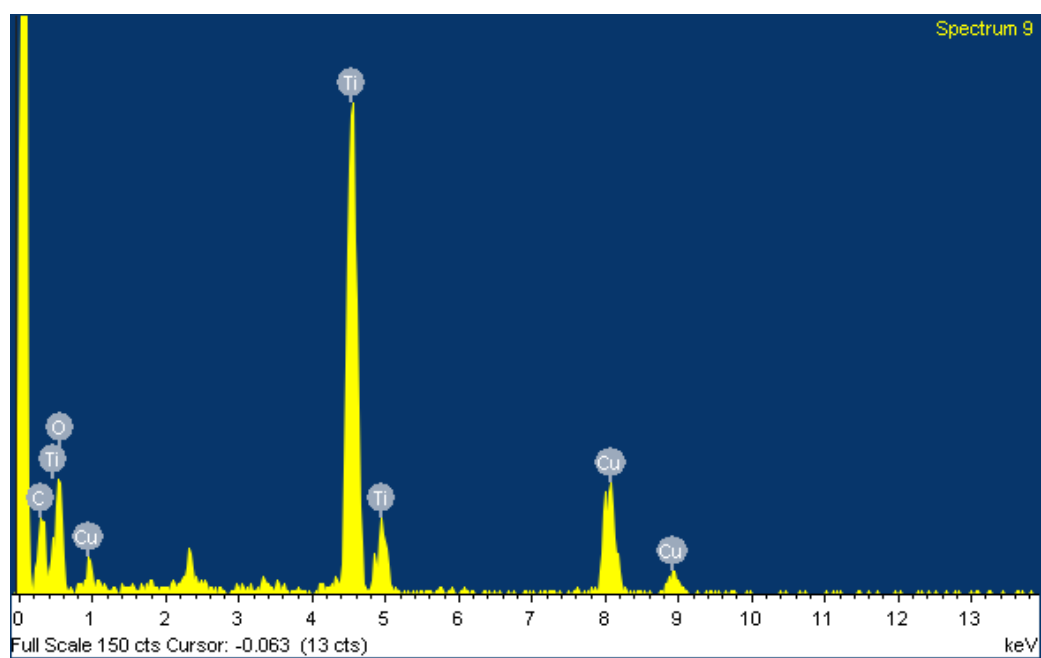

**Figure S2.** The energy-dispersive X-ray analysis (EDXA) of the illuminating electron beams on TiO<sub>2</sub>/graphene composites.
